# Supplementary material
Source: publisher figshare collection journal article supplement (https://acs.figshare.com/ndownloader/files/5928198)
Supplement: Supplementary file 1 [file 5928198]

# Electrodeposited, Transverse Nanowire Electroluminescent Junctions: SUPPORTING INFORMATION

Shaopeng Qiao,<sup>†</sup> Qiang Xu,<sup>‡</sup> Rajen K. Dutta,<sup>†</sup> Mya Le Thai,<sup>‡</sup> Xiaowei Li,<sup>¶</sup> and  
Reginald M. Penner<sup>\*,‡</sup>

<sup>†</sup>*Department of Physics and Astronomy, University of California, Irvine, California  
92697, United States*

<sup>‡</sup>*Department of Chemistry, University of California, Irvine, California 92697, United  
States*

<sup>¶</sup>*Department of Chemical Engineering and Materials Science, University of California,  
Irvine, California 92697, United States*

## S1. Detailed Process Flow for the Fabrication of a Single Transverse Nanowire Electroluminescent Junction

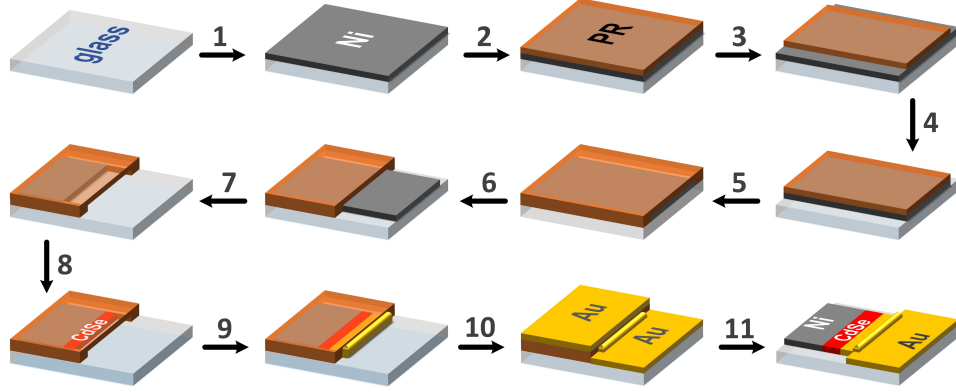

**Figure S1:** Detailed process flow. Step 1, a 60 nm thick layer of nickel was thermally evaporated on a precleaned soda lime glass slide. Step 2, a layer of photoresist was spincoated onto the nickel surface, followed by a soft-baking process. Step 3, a contact mask was used to photolithographically create a 20  $\mu\text{m}$  finger pattern on the photoresist layer. Step 4, the freshly exposed nickel layer was then removed using nickel etchant, resulting in a 20  $\mu\text{m}$  wide Ni finger covered by the photoresist. Step 5, the photoresist layer was then removed with acetone and a second layer of photoresist was spincoated. Step 6, half of the photoresist on the nickel finger was photolithographically removed. Step 7, exposed nickel was over-etched to create a horizontal trench. Step 8, the CdSe nanowire was then electrodeposited into the trench potentiostatically. Step 9, the gold contact was then electrodeposited onto the exposed edge of the CdSe nanowire until the gold emerged from the trench. Step 10, a layer of gold was thermally evaporated to form a connection with the electrodeposited gold contact. Step 11, the thermally evaporated gold on the photoresist coated portion of the device was removed by lift-off.

## S2. *EL* Measurement Set-up Schematic

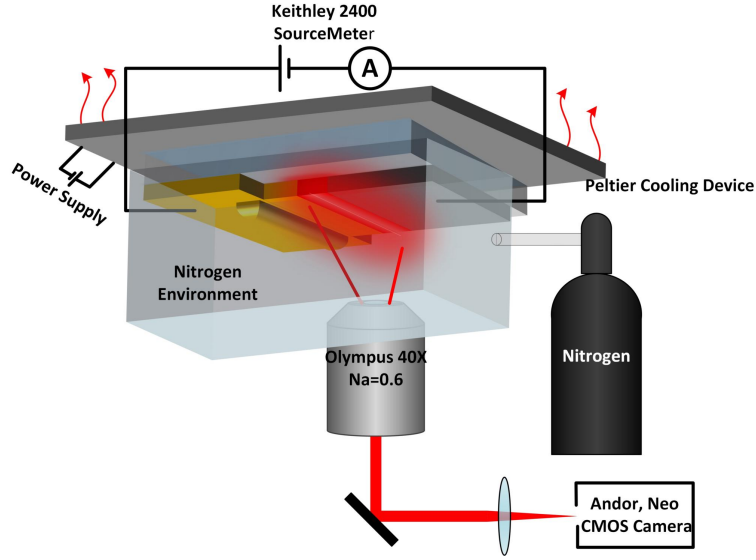

**Figure S2:** EL measurement set-up. The *tn-ELJs* was glued on a  $1\text{ inch} \times 3\text{ inches}$  glass slide then glued on a peltier cooling device using the copper tape. The peltier was used to remove the heat generated during EL measurement. The *tn-ELJs* was connected to a Keithley 2400 sourcemeter, and then the whole device was placed on an inverted microscope stage. The device along with the objective lens were wrapped with plastic wrap to create a sealed environment. The food wrap was then pierced through by a small glass pipe connected with a nitrogen tank. A nitrogen environment was created during EL measurement to avoid water condensation or frost.

### S3. Normalized $EL$ Spectra as a Function of Voltage

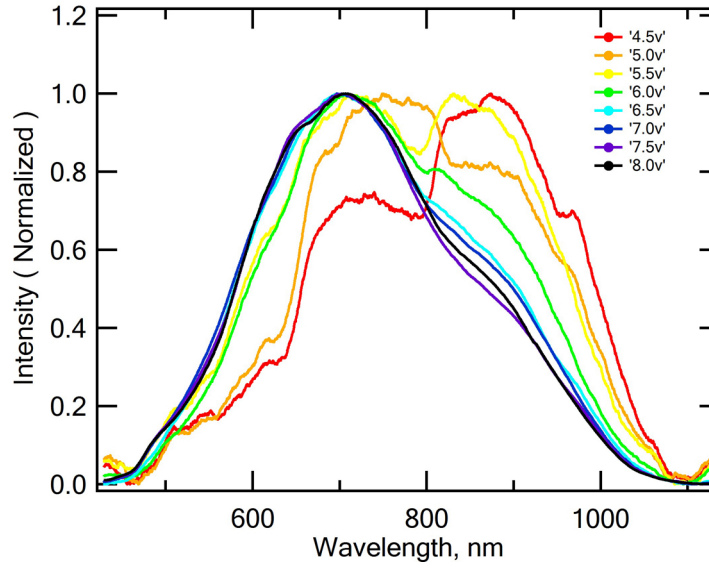

**Figure S3:** Normalized  $EL$  spectra as a function of  $E_{app}$  for a ten-element  $tn$ -ELJs with  $w_{CdSe} = 102$  nm.
